# Supplementary material
Source: ML conference proceedings conference paper supplement (https://openreview.net/forum?id=6EWOVxvJ5FI)
Supplement: supplementary_material [file attachment]

486 **A Appendix**

487 **A.1 Method 2**

488 In Method 2 the node features are not learned end-to-end by the agent, but instead generated as part  
 489 of the environment; see also Figure 6. To this end, we employ self-supervised learning to generate  
 490 a superpixel embedding, as explained in Section A.2. In case of a weak reward function, we find  
 491 Method 2 preferable over Method 1 which jointly learns the node features. To generate a well  
 492 performing agent with our method, the reward signal needs to be somewhat close to the "true" metric  
 493 when evaluating a proposed segmentation. If it is close enough, e.g. by direct supervision or fairly  
 494 specific priors such as the ones we use for the fruitfly dataset, we can use a weak state representation  
 495 and learn how to extract the node features jointly (Method 1). Conversely, if the reward does not fit  
 496 the "true" metric well, it is beneficial to remove the complexity of joint learning and provide a more  
 497 informative state representation (Method 2).

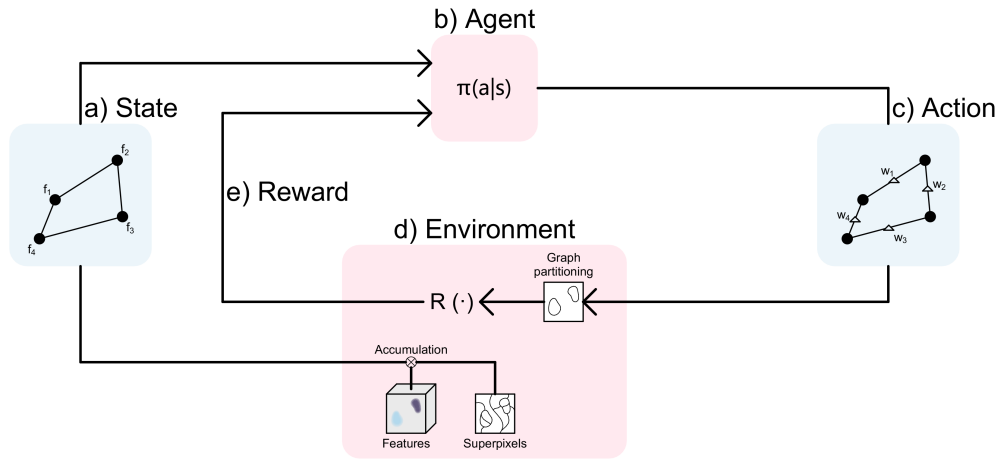

Figure 6: Interaction of the agent with the environment for Method 2: (a) shows the state which is composed of the superpixel graph where each node comes with a feature vector encoding features for the respective superpixel. This features are obtained by accumulation of pre-trained pixel-level features per superpixel; Given the state, the agent (b) predicts edge weights on the graph; These edge weights serve as the actions (c); the actions are processed by a graph partitioning algorithm which is part of the environment (d); (e) shows the rewards, based on the resulting segmentation. Rewards are obtained using a set of predefined and data dependent rules. The rewards are given back to the agent and the episode terminates.

498 **A.2 Self-supervised pretraining**

499 For self-supervised pre-training, we use a method based on the contrastive loss formulation of [49].  
 500 Consider a graph  $G = (V, E)$ , where the nodes in  $V = \{1, 2, \dots, n\}$  correspond to the individual  
 501 superpixels and the edges in  $E = \{(i, j) | i \neq j \text{ and } i, j \in V\}$  connect nodes with adjacent superpixels.  
 502 In addition, consider edge weights  $W \in \mathbb{R}^{|E|}$  associated with every edge. Here, we infer the weights  
 503 from pixel-wise boundary probability predictions and normalize the weights such that  $\sum_{w \in W} w = 1$   
 504 holds. We train a 2D U-Net to predict embeddings for each node in  $V$  by pulling together pixel  
 505 embeddings that belong to the same superpixel and pushing apart pixel embeddings for *adjacent*  
 506 superpixels. The intensity of the push force is scaled by the weight of the respective edge. With pixel  
 507 embeddings  $x_n$  and node embeddings  $f_i = \frac{1}{m_i} \sum_{k \in s_i} x_k$ , where  $m_i$  is the mass of the superpixel for  
 508 node  $i$  and  $s_i$  is the set of indices for all pixels of the corresponding superpixel, and in accordance

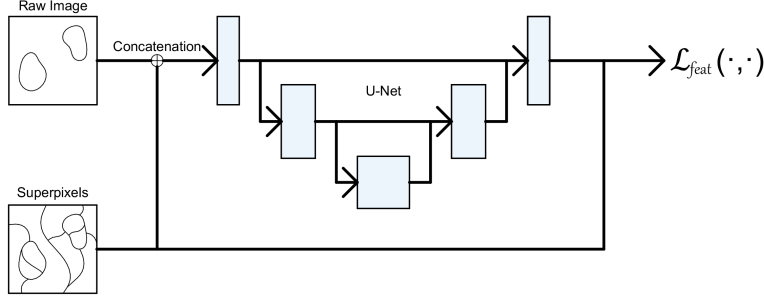

Figure 7: Training setup of the feature extractor. The input is a concatenation of the raw data and a smoothed edge map of the superpixels. The superpixel over-segmentation is used in the loss again as the supervision for learning the embedding space.

509 with [49] we formulate the loss as

$$\mathcal{L}_{var} = \frac{1}{|N|} \sum_{i=1}^{|N|} \frac{1}{m_i} \sum_{n=1}^{m_i} [d(f_i, x_n) - \delta_v]_+^2 \quad (12)$$

$$\mathcal{L}_{dist} = \sum_{(i,j) \in E} w_{(i,j)} [2\delta_d - d(f_i, f_j)]_+^2 \quad (13)$$

$$\mathcal{L}_{feat} = \mathcal{L}_{var} + \mathcal{L}_{dist} \quad (14)$$

510 Here  $[\cdot]_+$  refers to selecting the max value from the argument and 0. The forces are hinged by the  
 511 distance limits  $\delta_{var}$  and  $\delta_{dist}$ .  $d(\cdot)$  refers to the distance function in the embedding space. Since the  
 512 feature extractor is trained self-supervised, we give it a smooth edge map of the superpixels as well  
 513 as the raw data as an input, see Figure 7.

514 The training of the feature extractor happens prior to training the agent, see also Section A.1.

### 515 A.3 Reward Generation

516 We seek to express the rewards based on prior rules derived from topology, shape, texture, etc. Rules  
 517 are typically formulated per-object, Section A.8 describes the object-to-sub-graph reward mapping.  
 518 The reward function is part of the environment and the critic learns to approximate it via Q-learning,  
 519 enabling the use of non-differentiable functions.

520 This approach can also be extended to semantic instance segmentation where in addition to the  
 521 instance labeling a semantic label is to be predicted. To this end, each predicted object is softly  
 522 assigned to one of the possible classes and the reward is generated specifically for the predicted class.  
 523 We make use of this extension by separating the objects into a foreground and background class in  
 524 our experiments.

525 In addition to the sub-graph rewards our approach can also be extended to global rewards by global  
 526 pooling of the output of the critic GNN and adding the squared difference of global action value and  
 527 reward to Equation 4. Alternatively, the global reward can be distributed onto the sub-graph rewards  
 528 via a weighted sum of sub-graph reward and global reward. In the second approach a different global  
 529 reward can be specified per class in the case of the semantic instance segmentation formulation. We  
 530 make use of the per class global reward to encode a reward for the correct number of predicted objects  
 531 in our experiments.

532 The biggest challenge in designing the reward function is to avoid local optima. Since the reward  
 533 is derived from each predicted object, we define the reward by extracting shape features, position,  
 534 orientation and size of objects and compare them with our expectation of the true object’s features.  
 535 This similarity score should be monotonically increasing as the objects fit our expectation better.  
 536 All used similarity functions are to a certain extend linear, however an exponential reward function  
 537 can speed up learning significantly. Consider an object level reward  $r \in [0, 1]$ , which is linear. We

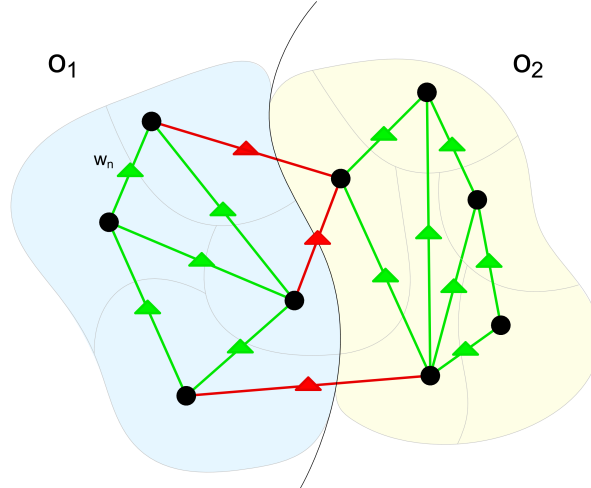

Figure 8: Object level rewards. We accumulate edge rewards over each object where we consider all edges that have at least one node within the respective object. E.g. for  $o_1$  we consider all edges that are covered by the light blue object as well as all the red "unmerge" edges.

538 calculate the exponential reward by

$$r_{exp}(r) = \frac{exp(r\theta)}{exp(\theta)} \quad (15)$$

539 where the factor  $\theta$  determines the range of the gradient in the output. We also find that it is better  
 540 to compute the reward as a "distance function" of all relevant features rather than decomposing it  
 541 into the features and simply summing up the corresponding rewards. In our experiments the latter  
 542 approach behaved quite unpredictably and often generated local optima which the agent could not  
 543 escape.

#### 544 A.4 Object level rewards

545 We have tested generating the rewards based directly on the object scores instead of using the subgraph  
 546 decomposition described in Section A.8. Since rewards are mainly derived from the features of the  
 547 predicted objects it seems reasonable to formulate the supervision signal based directly on those  
 548 objects. To this end we calculate a scalar reward per object as sketched in Figure 8. In this setting, the  
 549 agent needs the information about the predicted objects when it learns from its own actions, which is  
 550 in contradiction to the usual RL paradigm since the critic needs the predicted objects to predict the  
 551 action values. However, the critic is not used during exploration where the objects for the explored  
 552 actions are already available and can be used to predict action values. In this case, the critic uses a  
 553 second GNN to predict the per-object action values. It is applied to an object's subgraph, which is  
 554 composed of all edges that have at least one node in common with the respective object. The graph  
 555 convolutions are followed by a global pooling operation which yields the scalar action value. This  
 556 GNN replaces the MLPs used in the case of the reward subgraph decomposition. After extensive  
 557 testing, we found that this approach is always inferior to the subgraph decomposition.

#### 558 A.5 Impact of different feature space capacities

559 In Table 2 we compare the performance of our method, using different numbers of dimensions in  
 560 the space of the learned node features (the number of channels in the output of the feature extractor  
 561 U-Net). We find that the reduced capacity of small feature spaces helps the agent perform better.  
 562 Here we train and evaluate on the fruit fly embryo dataset.

Table 2: Quantitative evaluation of our method using different feature space dimensionality. We use Symmetric Best Dice as well as the Variation of Information metric to compare all results on the validation set.

| n feature channels | SBD               | VI merge          | VI split          |
|--------------------|-------------------|-------------------|-------------------|
| 4                  | $0.518 \pm 0.018$ | $0.889 \pm 0.081$ | $0.823 \pm 0.135$ |
| 12                 | $0.493 \pm 0.026$ | $0.821 \pm 0.158$ | $1.241 \pm 0.220$ |
| 16                 | $0.482 \pm 0.020$ | $0.838 \pm 0.118$ | $1.374 \pm 0.357$ |

### 563 A.6 Random seed evaluation

564 Figure 9 shows the training evolution of the average subgraph reward from different random seeds.  
 565 The model performance depends on the chosen seed and for the final comparisons we select the runs based on the best score. The seed is generated randomly on each run.

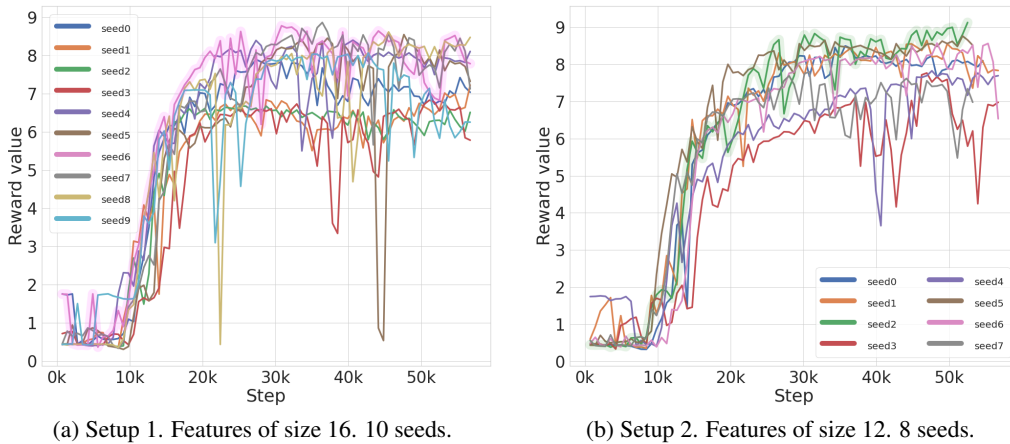

Figure 9: Running the same setup from different random seeds reveals a stable stride for high rewards. We select the model for comparison based on the best achieved reward (magenta line in Fig. 9a and green line in Fig. 9b) which makes the training/validation process completely independent on any ground truth annotations.

566

### 567 A.7 Gaussian weighting scheme

568 Figure 10 shows the Gaussian weighting scheme which was used to generate the rewards for the  
 569 fruitfly embryo data. It can be seen as a very approximate semantic segmentation and serves the  
 570 purpose of generating a reward maximum at the very approximate segmentation without using it.

### 571 A.8 Randomly generated subgraphs

572 We select subgraphs using Algorithm 1. Subgraphs are selected randomly starting from random  
 573 nodes and continuously adding edges to the subgraph until the desired size is reached. The size of the  
 574 subgraph is defined by the number of edges in the graph. Algorithm 1 selects edges such that the  
 575 subgraphs are connected and such that their density is high (low number of nodes in the subgraph).

### 576 A.9 Multistep Reinforcement Learning

577 We tested several methods that use multiple steps within one episode. In this formulation we predict  
 578 the changes starting from an initial state rather than predicting absolute values for the edge weights.  
 579 For example, we can start from a state defined by edge weights derived from a boundary map. Given  
 580 that this state should be somewhat close to the desired state we expect that a few small steps within

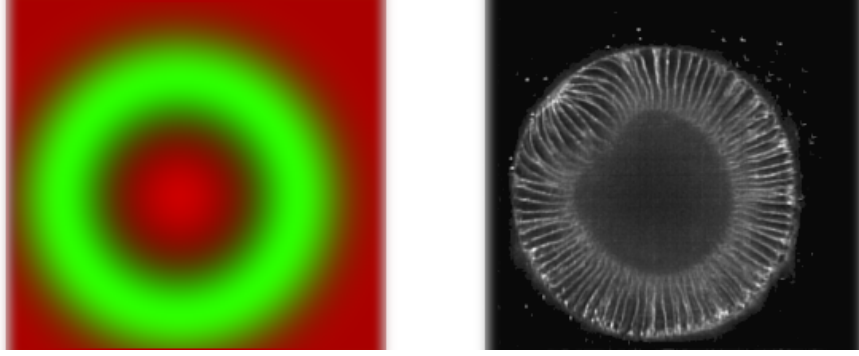

Figure 10: Weighting scheme for object rewards and merge affinity rewards, roughly encoding foreground location. Left: weights for object rewards in green and for merge affinity rewards in red, both are Gaussian and concentric. Right: an example of an underlying real image.

---

**Algorithm 1:** Dense subgraphs in a rag

---

**Data:**  $G = (V, E)$ ,  $l$   
**Result:** subgraphs by sets of  $l$  edges

```

1 Initialization:  $SG = \emptyset$ ;
2 while  $E \setminus SG \neq \emptyset$  do
3   pq = PriorityQueue;
4   prio = 0;
5   n_draws = 0;
6   sg =  $\emptyset$ ;
7    $sg_{vtx} = \emptyset$ ;
8    $i, j = (ij)$  s.t.  $(ij) \in E \setminus SG$ ;
9   pq.push( $i$ , prio);
10  pq.push( $j$ , prio);
11   $sg = sg \cup (ij)$ ;
12   $sg_{vtx} = sg_{vtx} \cup i$ ;
13   $sg_{vtx} = sg_{vtx} \cup j$ ;
14  while  $|sg| < l$  do
15     $n, n\_prio = pq.pop()$ ;
16    n_draws ++;
17     $adj = \{(nj) | \exists (nj) \in E \text{ and } \exists j \in sg_{vtx}\}$ ;
18    forall  $(nj) \in adj$  do
19       $sg = sg \cup (nj)$ ;
20      n_draws = 0;
21    if  $|adj| < deg(n)$  then
22      n_prio -=  $(|adj| - 1)$ ;
23      pq.push( $n, n\_prio$ );
24    if  $pq.size() \leq n\_draws$  &  $\exists j | (nj) \in E, j \notin sg_{vtx}$  then
25       $j \in \{j | (nj) \in E, j \notin sg_{vtx}\}$ ;
26      prio ++;
27      pq.push( $j, prio$ );
28       $sg = sg \cup (nj)$ ;
29       $sg_{vtx} = sg_{vtx} \cup j$ ;
30   $SG = sg \cup SG$ 
31 return  $SG$ 

```

---

581 one episode should be sufficient. In our experiments, we have typically used three steps per episode  
582 and used actions that can change the weight per edge by the values in  $[-0.1, 0.1]$ .

583 This approach generates an action space that is exponentially larger than in the stateless formulation.  
584 A priori this setup might still be more stable because it is not possible to diverge from a given solution  
585 so fast due to the incremental changes per step. Also consider the linearity of the paths to the optimal  
586 state, which can be generated by giving a high quality reward at every step and not only for the final  
587 segmentation. Take for example an initial edge with weight 0.3 and its respective ground truth edge  
588 with value 0. We can give a reward that mirrors the correct confidence of the action, which in this  
589 case would be the negative action value  $r = -a$ . This allows us to set the discount factor of the RL  
590 setup to 0, because the path to the correct edge weight will be linear and the correct direction will be  
591 encoded in the reward at every step. Therefore the rewards for the following steps are not needed.  
592 Setting the discount to 0 generates a problem of equal size as the single step RL method, with the  
593 disadvantage that the ground truth direction of the path for each edge must be known. Therefore this  
594 setup is limited to fully supervised rewards only.

595 Another possible setup is to give a constant reward at each non terminal step and an unsupervised  
596 one at the terminal step with a discount factor  $\gamma > 0$ . We tested this setup extensively against the  
597 stateless setup and found that it was not competitive.

## 598 **A.10 Hyper-parameters and network details**

599 For U-Net, we use the standard implementation with features maps size of 32, 64, and 128. The  
600 backbone for both actor and critic are GNNs. In addition, the critic employs different MLPs, one for  
601 each subgraph size. Most of the hyperparameters for actor, critic and U-Net are chosen empirically  
602 and given in the configuration files in the main repository.

603 The source code with brief instructions is posted on Anonymized GitHub<sup>1</sup>. The dataset is temporarily  
604 available on Google Cloud<sup>2</sup>.

## 605 **A.11 Direct supervision**

606 The aim of this project has been to find a way to train a segmentation algorithm from not-necessarily-  
607 differentiable rules, priors and expectations for the segmented objects. Looking ahead to the next  
608 stages, we have also qualitatively evaluated the behavior of our setup in case direct supervision such  
609 as fully segmented images is available. We tried both full supervision (Fig. 11) and mixed supervision,  
610 using one fully segmented image and also the prior rules (Fig. 12). Under full supervision with a set  
611 of ground-truth edge weights, we compute the the Dice Score [50] of the predicted edge weights  $a$   
612 and the ground-truth  $\hat{a}$  for each sub-graph and use it as reward. We find this function to be robust by  
613 class imbalance present in our setup. In both cases, the agent learns to segment the circles correctly,  
614 demonstrating fast and robust convergence. Note, how learned pixel features converge to a state  
615 which strongly resembles a semantic segmentation of the image.

---

<sup>1</sup>[https://anonymous.4open.science/r/nips\\_paper\\_rlforseg/](https://anonymous.4open.science/r/nips_paper_rlforseg/)

<sup>2</sup>[https://drive.google.com/file/d/1mHz0uIcLmZP3o4Z\\_F53bIHZAe61e9vSS](https://drive.google.com/file/d/1mHz0uIcLmZP3o4Z_F53bIHZAe61e9vSS)

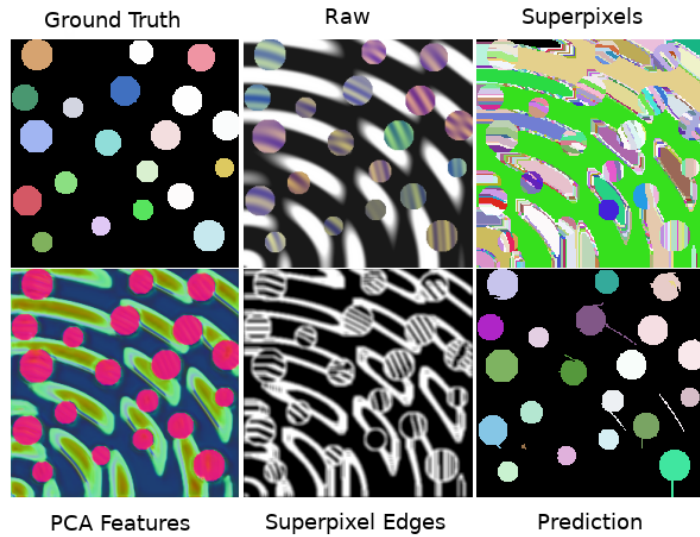

Figure 11: An example of a fully supervised prediction on the "Circles" dataset. This was obtained with use of the Dice score over subgraphs as a fully supervised reward using Method 1. We initialized the the feature extractor U-Net with the pretrained embeddings from Subsection 4.1. It is interesting to see how the features for the circles are emphasized a lot more after training.

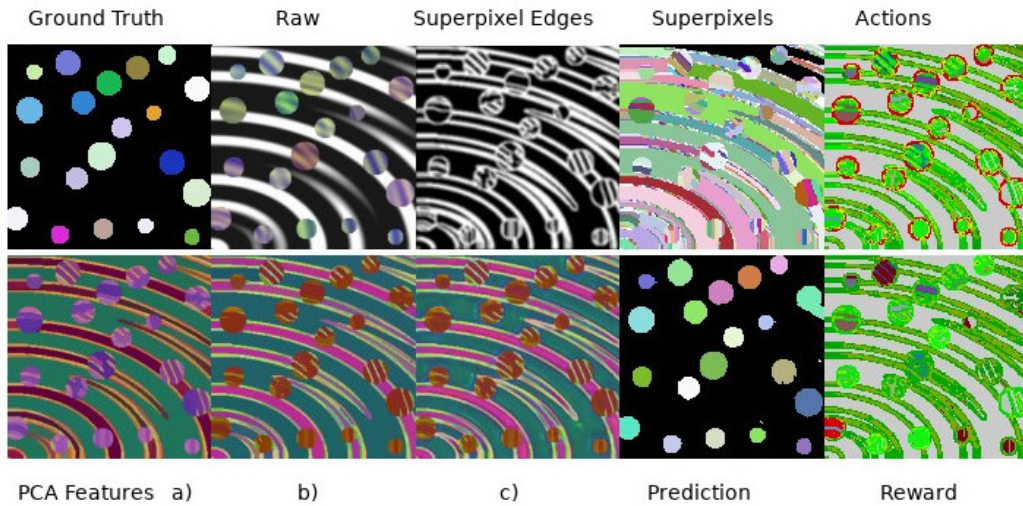

Figure 12: An example for prediction with mixed supervision on the "Circles" dataset. The reward was defined as follows: we use for all but for one image the unsupervised CHT reward and for one image we make use of ground truth and the Dice score as the reward. We find that this mixed reward setting leads to improved performance compared to the unsupervised CHT reward.
